# Supplementary material for: Episodic Neoglacial expansion and rapid 20th Century retreat of asmall ice cap on Baffin Island, Arctic Canada and modeledtemperature change
Source: Copernicus journal article supplement (doi:10.5194/cp-2017-27), 2017-03-20
Supplement: Supplementary file 1 [file cp-2017-27-supplement.pdf]

## 1 **1. Supplemental Information – Glacier Model**

### 2 **1.1. Glacier Model Overview**

3 This model uses a finite-element numerical model from (Kessler et al., 2006) where ice  
4 accumulation and movement on a given terrain surface is governed by explicit equations for ice  
5 flux and mass conservation. The mass balance is the combination of a prescribed annual  
6 accumulation and calculated annual melt. Melt is approximated using a positive degree-day  
7 method with an additional factor to account for melt from solar radiation. The model is  
8 subsequently calibrated to observed ice limits and transient scenarios are run to explore climate  
9 sensitivity and the required climate forcings needed to reconstruct Divide Ice Cap activity over  
10 the last ~2000 years. This supplement provides details on model design, parameter selection and  
11 calibration, sensitivity analysis, and characterization of uncertainty.

## 12 **2. Glacier Model Setup**

### 13 **2.1. Terrain Production**

14 Prior to model implementation, a terrain model of the bedrock surface is required. This  
15 involves removing (to the best approximation) the modern Divide Ice Cap from an existing  
16 digital elevation product. ASTER digital elevation data from 2011 CE was used as a base for the  
17 two-dimensional terrain model, resampled to a 60 m pixel size. The ASTER data product was  
18 retrieved from the online Data Pool, courtesy of the NASA Land Processes Distributed Active  
19 Archive Center (LP DAAC), USGS/Earth Resources Observation and Science (EROS) Center,  
20 Sioux Falls, South Dakota, [https://lpdaac.usgs.gov/data\\_access/data\\_pool](https://lpdaac.usgs.gov/data_access/data_pool). The resulting surface  
21 was smoothed using a 7x7 mean filter to remove artifacts in the raw data that would lead to  
22 instabilities in the model. Modern ice, including Divide Ice Cap and the ice on the surrounding  
23 summits, had to be removed to create an ice-free terrain to model upon. Using the best  
24 approximation of basal shear stress ( $\tau_b$ ) to be ~100 kPa (Haeberli, 2016), current ice thicknesses  
25 (H) were calculated following Cuffey and Paterson (2010):

$$26 \quad H = \frac{\tau_b}{\rho g \theta}$$

27 where  $\rho$  is the density of ice ( $917 \text{ kg m}^{-3}$ ),  $g$  is gravitational acceleration ( $9.81 \text{ m s}^{-2}$ ) and  $\theta$  is the  
28 surface slope of the modern ice surface. Calculated thicknesses were then subtracted from the  
29 modern terrain surface to produce an ice-free surface. Eventual model runs show that calculated  
30 and modeled modern ice thickness are the same within 10% of each other.

### 31 **2.2. Mass Balance**

32 Kessler et al. (2006) drove ice formation with a climate dictated by an equilibrium line  
33 altitude (ELA), a mass balance gradient with elevation, and a maximum positive balance  
34 (maximum accumulation). However, the overall low accumulation rates of our high-latitude site  
35 and the variable aspect of the Divide Ice Cap, which increases the influence of solar radiation  
36 during the melt season, necessitates a different approach (Benn and Evans, 2010). Ice core  
37 records, observational studies in the eastern Canadian Arctic, and previous modeling work  
38 suggest a maximum accumulation of 0.3 m water equivalent (m.w.e.) per year throughout the

39 Holocene (Hooke, 1976; Serreze et al., 1995; Anklin et al., 1998; Mair et al., 2005), which, given  
40 the limited elevation range of the Divide Ice Cap location, is applied as the annual accumulation  
41 across the whole model surface.

42 Although precipitation records are sparse near the study site, ice core records from the  
43 summit of the Greenland Ice Cap show that regionally, precipitation varied by only ~6% over the  
44 last 1200 years (Alley, 2004). Given the relatively low accumulation rates, summer temperature  
45 is likely the dominant driver of glacier advance and retreat at Divide Ice Cap (Koerner, 2005).

46 Temperature index melt models generally capture the majority of summer melt due to the  
47 strong relationship between air temperature and components of the surface energy balance  
48 (Braithwaite and Olesen, 1989; Lang and Braun, 1990), and have been successfully applied on  
49 larger scales in the eastern Canadian Arctic (Marshall and Sharp, 2009). However, the relatively  
50 low accumulation rates, small elevation range, and variable aspect and slope at Divide Ice Cap  
51 along with the asymmetric trimlines surrounding summits (Figure 1) suggests that the glacier  
52 system is sensitive to small temperature changes and that incoming solar radiation is an  
53 important factor in the overall glacier mass balance. Additionally, previous studies of the  
54 orientation of cirque glaciers on Baffin Island (Williams, 1975) and summertime snow patch  
55 distribution in the eastern Canadian arctic (Lauriol et al., 1986) emphasize the role of solar  
56 energy in enhancing melt on southerly aspects. Wind redistribution of snow could be another  
57 factor in the more positive mass balance of northerly aspect of the Divide Ice Cap. However,  
58 available meteorological wind direction data from Clyde River to the north and Iqaluit to the  
59 southwest both show the prevailing winds to be north-northwesterly (Gearheard et al., 2010;  
60 Nawri and Stewart, 2010). While these observations do not rule out the possibility that local  
61 winds at Divide Ice Cap differ, and move snow from south-facing to north-facing slopes, they  
62 strongly suggest that the dominant wind patterns cannot explain the asymmetric mass balance. In  
63 areas of overall low accumulation and relatively low relief where the snowline is only just below  
64 mountaintops, solar radiation modulated by slope and aspect can exert a strong control on the  
65 annual pattern of accumulation (Benn and Evans, 2010).

66 Given the above concerns regarding melt driven by temperature and solar radiation, we  
67 calculate the summer melt rate ( $M$ , mm day<sup>-1</sup>) using a radiation modified positive degree day  
68 melt model for air temperatures ( $T$ ) above 0°C (Hock, 2005; Jonsell et al., 2012; Kane et al.,  
69 1997):

$$70 \quad M = \begin{cases} m_T(PDD) + m_R(1 - \alpha)R; & T > 0^\circ\text{C} \\ 0 & ; T < 0^\circ\text{C} \end{cases}$$

71 The melt contribution from air temperature is calculated using the product of an degree-day  
72 melt factor ( $m_T$ , 6.3 mm day<sup>-1</sup> °C<sup>-1</sup>; Braithwaite, 1981) with positive-degree days ( $PDD$ ) over the  
73 terrain surface. Using a prescribed sea-level mean annual temperature (MAT), a MAT at  
74 elevation is calculated using a near surface lapse rate of -4.9°C km<sup>-1</sup> (Gardner et al., 2009).  
75 Annual temperature cycles are then calculated at all elevations using an amplitude of 20°C  
76 (based upon daily temperature records from Dewar Lakes meteorological data from 1959-2015)

77 around the MAT. Integration of the portion of the curve where  $T > 0^\circ\text{C}$  provides the PDD for each  
78 location on the terrain surface.

79 Calculation of the melt contribution from radiation employs the product of a radiation melt  
80 factor ( $m_R$ ,  $0.036 \text{ mm day}^{-1} (\text{W m}^{-2})^{-1}$ ; obtained via model calibration, see below) with that  
81 portion of the incident solar radiation ( $R$ ;  $\text{W m}^{-2}$ ) that is not reflected from the surface (albedo =  
82  $a = 0.5$  (Benn and Evans, 2010)). Solar radiation ( $R$ ) for the Divide Ice Cap latitude and  
83 elevation is calculated following Kustas et al. (1994 and Kumar et al. (1997)). In this case,  
84 radiation is also modulated based on slope and aspect (Cuffey and Paterson, 2010; Hock, 2005;  
85 Kumar et al., 1997). Melt from solar radiation only takes place when  $T > 0^\circ\text{C}$ , which is calculated  
86 from the annual temperature cycle from the *PDD* component. Net mass balance is then  
87 calculated as the winter mass balance (accumulation) minus the summer mass balance (melt).

### 88 **2.3. Modeling Ice Surfaces**

89 Driven by the above mass balance, the model, following Kessler et al. (2006) calculates  
90 an ice surface on the supplied 2-D terrain surface using explicit equations for ice flux and mass  
91 conservation (equations 1 and 8 respectively in Kessler et al. (2006)). Using a shallow ice  
92 approximation and the recommended coefficient for Glen's flow law for polar ice of  $3.5 \times 10^{-25}$   
93  $\text{Pa}^{-1}\text{s}^{-1}$  (Cuffey and Paterson, 2010), ice discharge is driven by the shear stress associated with ice  
94 thickness and surface slope. Field observations of the highly preserved land surface, including  
95 vegetation still in growth position (Figure 1), justify a no-slip basal boundary condition. Sliding  
96 was therefore disallowed, and ice moves only by internal deformation.

## 97 **3. Glacier Model Scenarios**

### 98 **3.1. Model Calibration**

99 Prior to running full simulations of the last ~2000 years, the model must be calibrated for  
100 an appropriate solar radiation melt factor ( $m_R$ ). Traditionally this value is calibrated using in  
101 situ solar flux and melt rate data. However, since that information is lacking here, a different  
102 approach must be taken.

103 Given the transect chronology observed, the simplest (and most likely) history involves  
104 continuous ice advance (though likely at varying rates) from ~26 BCE – 1900 CE followed by  
105 modern retreat from ~1900 to present. Given this scenario, the model was calibrated to the  
106 observed transect chronology and run to maximum Holocene extent conditions (or at ~1900,  
107 culmination of the LIA) using a range of accepted  $m_R$  (Jonsell et al., 2012) values (and other  
108 parameters above). In other words, given a  $m_R$  value, the transect chronology was used to find  
109 the required temperature changes to advance ice through the observed chronology (Figure 1).

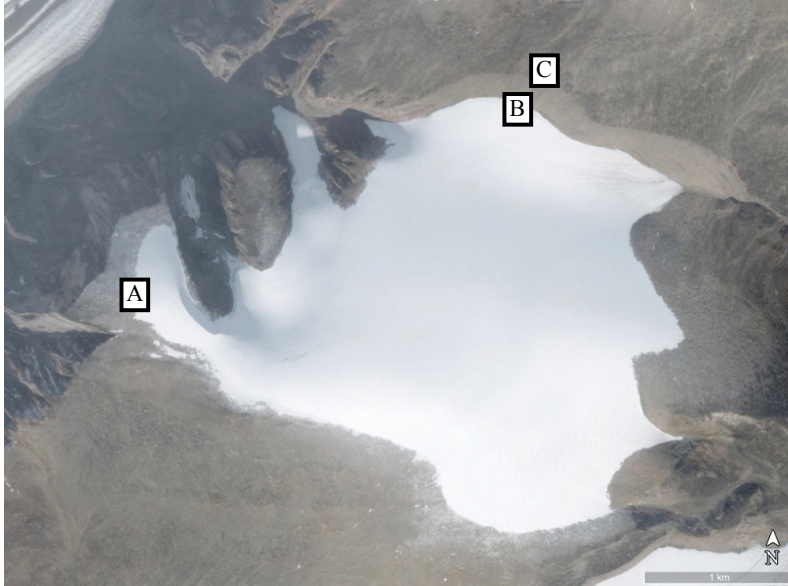

110  
111

**Figure 1: Divide Ice Cap showing major plant radiocarbon age constraints A, B, and C from oldest to youngest.**

112  
113  
114  
115

These Holocene maximum extent model runs were then compared to the observed maximum extent as seen through trimlines on the land surface (Figure 2) to find the best fit, and thus the approximate  $m_R$  for this study.

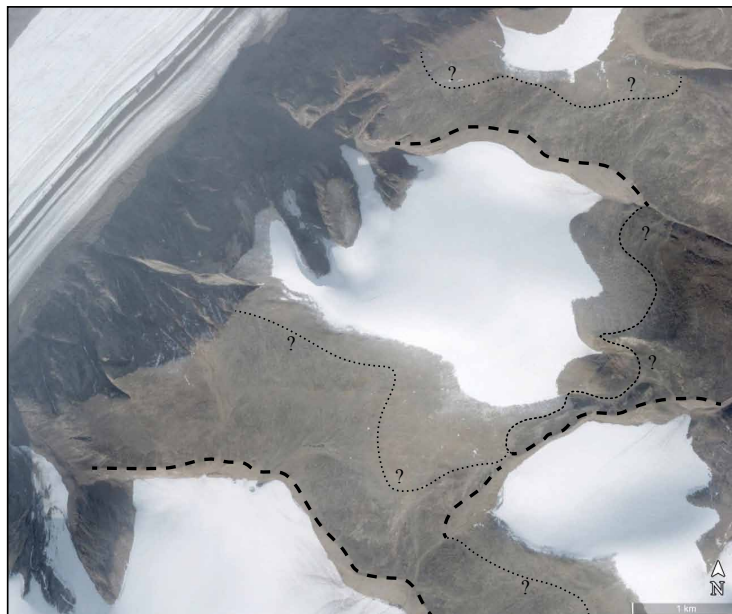

116  
117  
118

**Figure 2: Satellite image of Divide Ice Cap and surround ice bodies with secure LIA trimlines (heavy dashed lines) and approximate LIA trimlines (dotted lines) show. 2011 satellite image from courtesy of Digital Globe.**

119  
120  
121  
122

With this approach we find that a  $m_R$  value of  $0.036 \text{ mm day}^{-1} (\text{W m}^{-2})^{-1}$  provides the best reproduction of Holocene maximum ice extent (Figure 3). Although not a perfect match (model uncertainty discussed below),  $m_R$  values above or below this value produced far too much or too little ice (respectively), making this value our closest approximation.

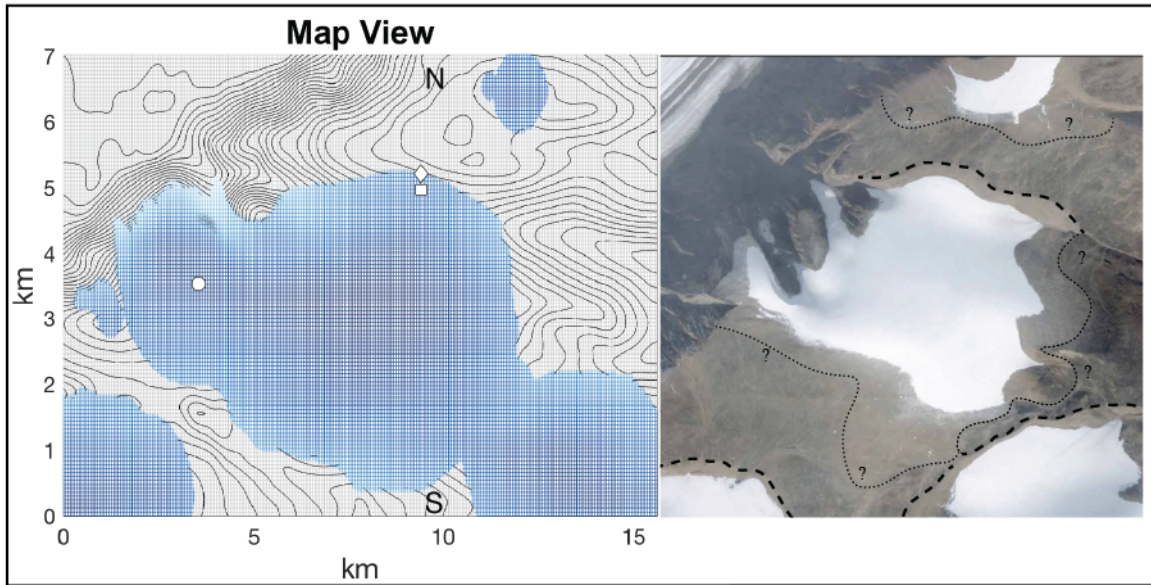

123  
124  
125  
126  
127

Figure 3: Map view of simulation (left panel) output showing the modeled maximum Neoglacial extent (contour interval is 30 m). Also shown is sample #12 (circle), 1000 CE margin (square), and Neoglacial maximum trimline (diamond). Right panel shows a google earth 2011 image with Neoglacial maximum extent trimlines (dashed lines) and approximate trimlines (dotted lines) shown.

128

### 3.2. Full Simulations

129

130

131

132

133

134

135

136

137

138

139

140

141

142

143

144

Using the calibrated model from above, it is possible to reproduce the full history of advance and retreat at Divide Ice Cap over the last ~2000 years. Beginning with ice immediately behind the oldest chronological tie-point ('A'; Figure 1), temperature was lowered to advance ice between Points 'A' and 'B' (Figure 1; ~26 BCE – 1000 CE). Temperatures were then lowered again in order to advance ice between points 'B' and 'C' (~1000 – 1910 CE; Figure 1) in order to attain the Holocene maximum configuration from above (Figure 3). Following this advance, it is possible to warm temperature and model ice cap melt of the past century. Assuming that retreat began early in the 20<sup>th</sup> century around 1910, a linear rate of warming (the simplest case) can be found that drives the ice margin back to its 2015 position in the request 105 years (Figure 4). Using the previously calibrated model, a warming rate of 0.028 °C yr<sup>-1</sup> forces ice margin retreat in ~108 years, equaling a cumulative warming of ~2.8°C. Although warming at Divide Ice Cap was unlikely linear over this entire period, this model warming falls between the longer term warming at Dewar Lakes (0.0141 °C yr<sup>-1</sup> from 1959-2015) and more recent warming at Qikiqtarjuaq (0.0867 °C yr<sup>-1</sup> from 1995-2009). With this optimized warming trend, the full 2000-year history of Divide Ice Cap constrained by plant radiocarbon ages and observed trimlines can be reconstructed using the minimum required temperature fluctuations.



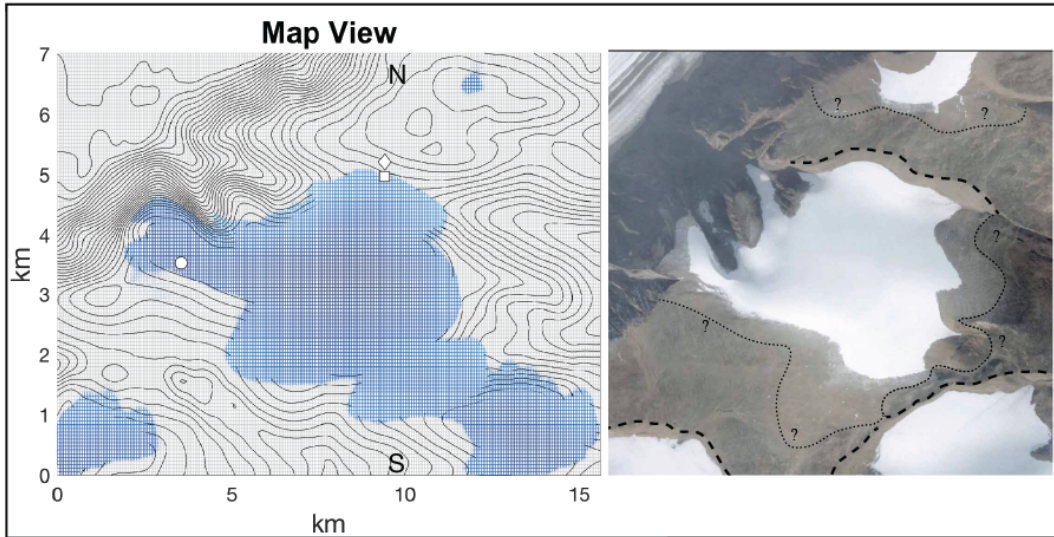

Figure 4: Final output from the full simulation model showing the modeled modern (2015 CE) extent of the ice cap following the advance and retreat scenarios outlined in text.

145  
146  
147

148

#### 149 4. Sensitivity Analysis

150 Among the parameter values prescribed for this model, the uniform and constant  
 151 accumulation rate is perhaps the most unrealistic and therefore could have the largest impact  
 152 on the model outcome. To test model sensitivity to accumulation rate, we ran the model to  
 153 completion as above using 0.2 and 0.5 m.w.e. Keeping all other parameters the same,  
 154 including the solar radiation melt factor calibrated from the original run, simulations with 0.5  
 155 m.w.e. fail to reproduce the correct LIA ice configuration. This is partly due to the fact that a  
 156 higher accumulation rate has a higher equilibrium line altitude (ELA) and necessitates a  
 157 warmer mean annual temperature than the original scenario to accumulate snow/ice at the  
 158 same elevations (the same temperature forcing with a higher accumulation rate would  
 159 produce too much ice and covers the entire study area). This higher temperature increases the  
 160 length of the melt season (Figure 5), therefore amplifying the influence of the solar radiation  
 161 melt factor (which is only in effect when air temperature is above 0°C).

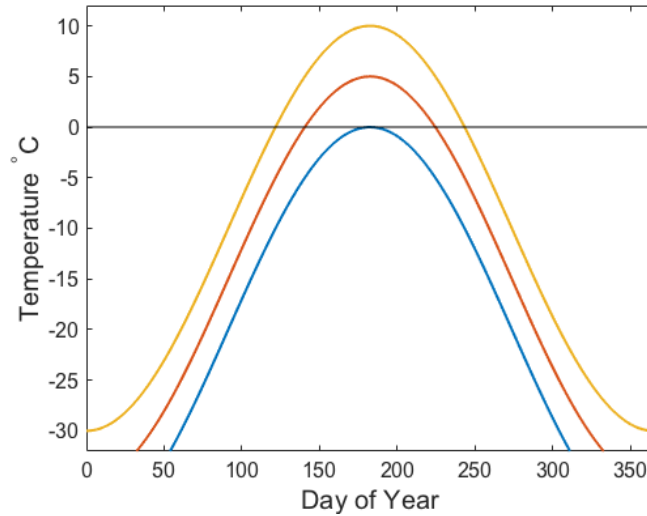

162  
163  
164

**Figure 5: Modeled daily annual temperatures illustrating the changing length of melt season (portion of curve above 0°C) with changing mean annual temperature.**

165 This then amplifies the asymmetry of ice distribution and prevents ice from advancing  
166 through the transect chronology as observed. However, when the solar melt factor is lowered  
167 to compensate for the above increase in melt season length, the only way to advance ice  
168 through the chronology in the observed time constraints is to raise temperatures during the  
169 2<sup>nd</sup> millennium CE and through the LIA, which itself is highly unlikely. Additionally, the  
170 Holocene maximum extent from these higher accumulation and lower solar melt factor runs  
171 deviate greatly from the observed maximum extent (Figure 6).

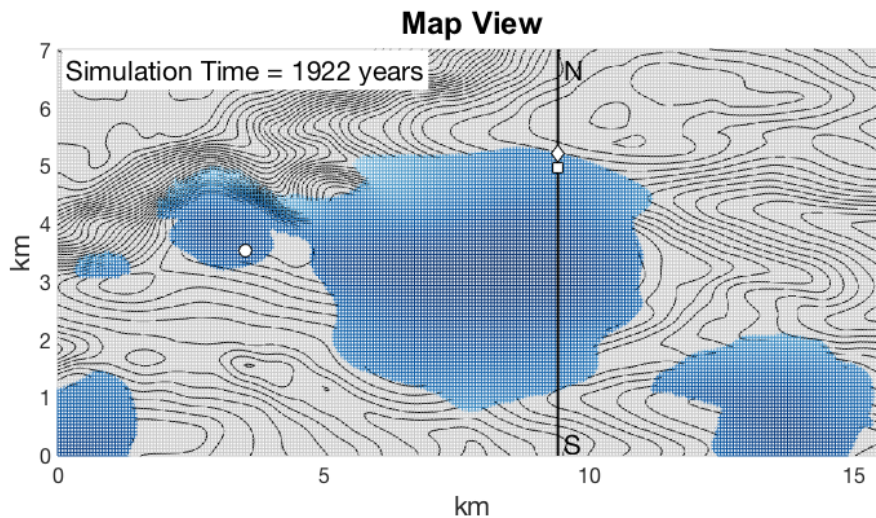

172  
173  
174

**Figure 6: Maximum Holocene extent under higher accumulation rate and lower solar radiation melt factor illustrating highly asymmetric configuration deviating from observed maximum extent (Figure 2).**

175 These results from the higher accumulation scenario suggest that indeed the accumulation  
176 rate at the study site is likely less than 0.5 m.w.e.

177 Conversely, a lower accumulation rate of 0.2 m.w.e. raises the ELA and thus requires  
178 slightly cooler temperatures to accumulate ice at the correct elevations. When run with the

179 same parameter values as the original simulation we find that total minimum required  
180 cooling over the last ~2000 years increases from 0.45 to 0.5°C. This makes sense, since less  
181 accumulation would raise the ELA, then a temperature decrease is needed to lower it again.  
182 However, since cooler mean annual temperatures shorten the melt season, and lessening the  
183 influence of solar melt, model simulations with a lower accumulation rate have less  
184 asymmetry in the final ice configuration, and thus deviating from the observed Holocene  
185 maximum ice configuration (Figure 7).

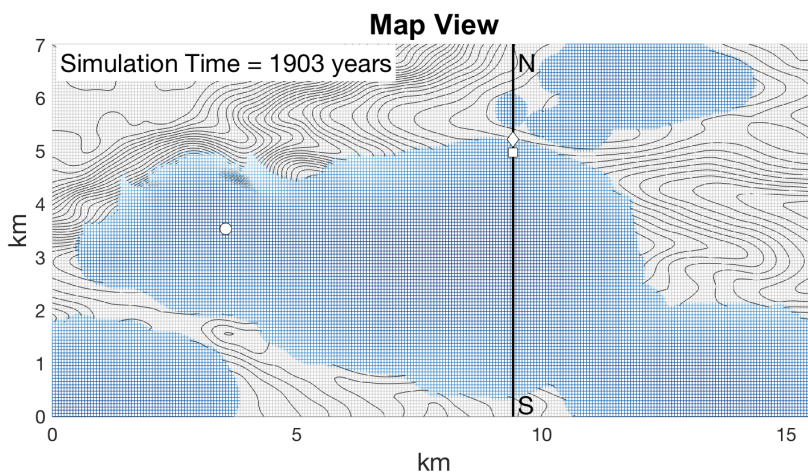

186  
187 **Figure 7: Modeled Holocene maximum extent for a lower accumulation and same solar radiation melt factor as**  
188 **original scenario. Note lack of ice cap asymmetry which fails to match the observed maximum extent**

## 189 5. Glacier Model Uncertainty

190 In the modeling experiments used in this study, uncertainty is difficult to quantify, but it  
191 is worthwhile to acknowledge potential sources of error and uncertainty. First, though  
192 modeled ice thicknesses agreed with the thickness of modern ice removed to create an  
193 unglaciated surface, collection of subglacial topography data would greatly reduce the error  
194 here. Sensitivity analysis showed that the accumulation rate is likely fairly accurate,  
195 however, longer term records of accumulation in the region would help to reduce uncertainty  
196 with the mass balance. Additionally, in situ mass balance data, including incoming solar  
197 radiation would allow for the calibration of a local solar radiation melt factor (e.g., Jonsell et  
198 al., 2012). Additionally, wind redistribution of snow likely plays a part in the mass balance of  
199 Divide Ice cap and the asymmetry present in the Holocene maximum extent. Capturing this  
200 factor is beyond the scope of this study, but important to acknowledge. The model in this  
201 study captures the first-order trends and highlights areas of where similar future studies could  
202 benefit from additional observation and measurements to reduce error and improve model  
203 performance.

## 204 6. Comparison to Modeled Temperatures

205 This section describes how we utilized global climate model simulations to compare to  
206 the temperature changes for Divide Ice Cap (DIC) reported here. Otto-Bliesner et al. (2016)  
207 used the Community Earth System Model (CESM) version 1.1 with the Community



208 Atmospheric Model 5 (CAM 5) to produce the CESM Last Millennium Ensemble (LME).  
209 The model was branched from an 1850 CE control, spun up under 850 CE conditions, and  
210 then run to 1850 CE using orbital, solar, volcanic, changes in land use/cover and greenhouse  
211 gases forcings (see Otto-Bliesner et al., 2016 for details). On average, the 13 LME members  
212 show that the last millennium was  $\sim 0.2^{\circ}\text{C}$  cooler than 850 CE conditions in the terrestrial  
213 region of  $60\text{-}90^{\circ}\text{N}$  and  $90^{\circ}\text{W}\text{-}60^{\circ}\text{E}$  (Fig. 8), similar to the results of our DIC glacier model  
214 presented here.

215 In order to perform a comparison with the DIC results over the last 2 millennia, we also  
216 analyzed the ongoing *past2K* simulation with the same model version as used for the CESM  
217 LME. That simulation was initialized from the 850 CE control from Otto-Bliesner et al.  
218 (2016) and spun up for 1 CE conditions. We then ran it forward to 1850 CE using forcing  
219 compiled by the PMIP4 working group (Jungclaus et al., 2016)At the time of submission, the  
220 simulation was still running and had only reached 1270 CE. However, the simulation  
221 indicates that the first millennium CE was  $\sim 0.2^{\circ}\text{C}$  cooler than 1 CE conditions (Fig. 8),  
222 similar to the results of the DIC glacier model presented here.

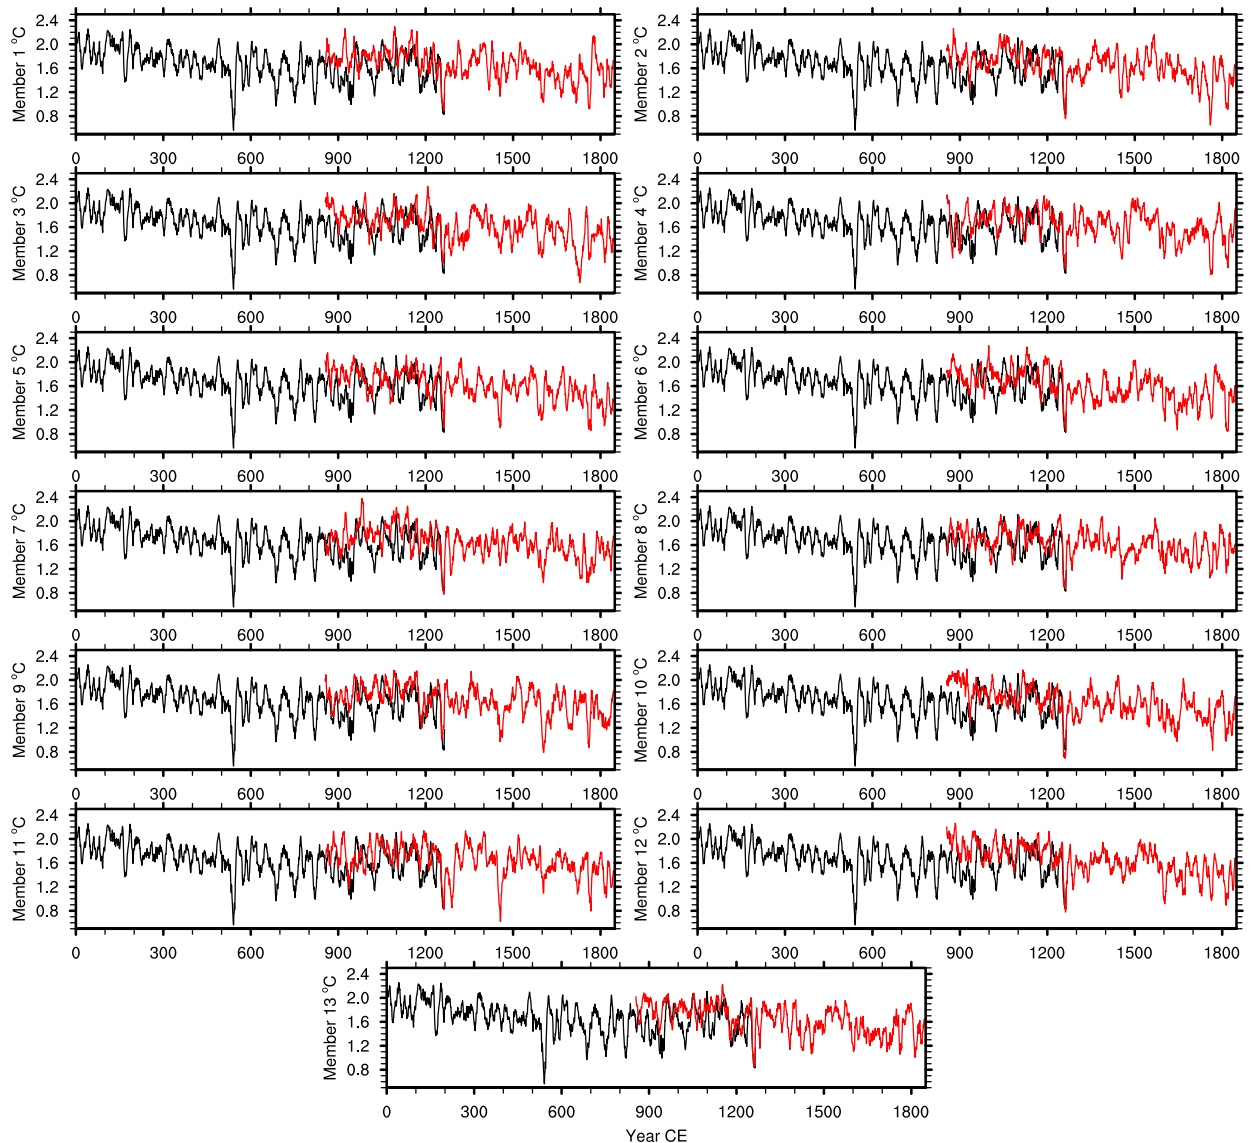

224  
 225  
 226  
 227  
 228

**Figure 8: Simulated decadal 2 m air temperature (°C) over land during JJA in the Atlantic Arctic (90W-60E, 60N-90N) from the 13 fully-forced CESM-LME simulations (red curves) shown against the ongoing CESM past2k simulation (black curve). The simulations indicate  $\sim 0.2^{\circ}\text{C}$  of cooling in the first and second millennium, though some offset between the simulations is apparent, likely due to the different initial conditions.**

229  
 230  
 231  
 232  
 233  
 234  
 235  
 236

Although the full 0-1850 CE simulation was incomplete at the time of submission, it is still possible to use both the LME and ongoing simulations to estimate temperature change for the Atlantic Arctic over the past  $\sim 2000$  years. The LME members and our simulation overlap between 850-1270 CE, and the mean offset between the runs approaches a steady value of  $+0.21^{\circ}\text{C}$  as the years of overlap increase. The mean variance in the offset falls below 1% of initial variance as the period of overlap increases reaches  $\sim 125$  years for all 13 members, meaning that our 250 years of overlap is sufficient to capture the systematic offset between our first millennium simulation and the LME simulations (Fig. 9).

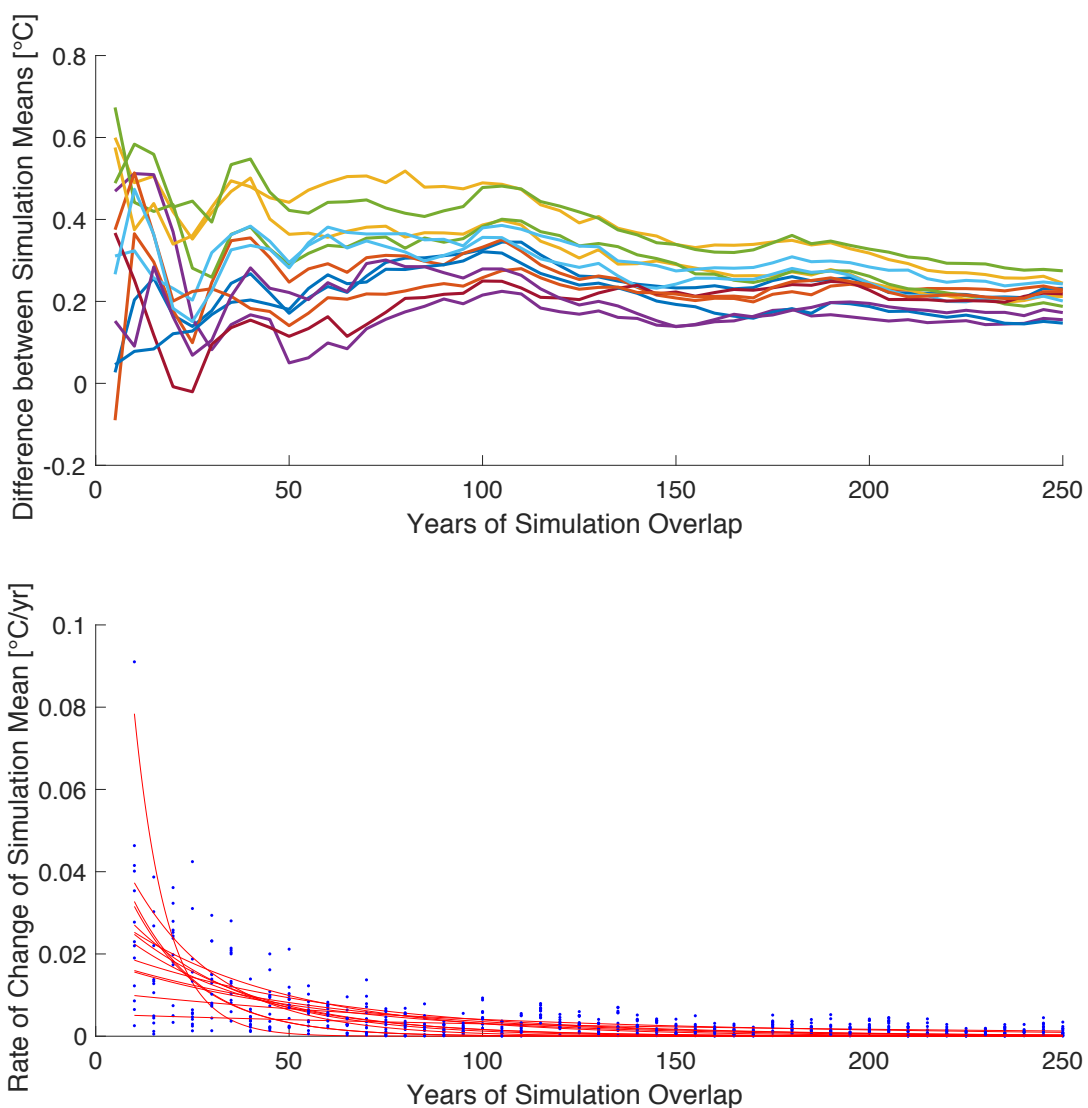

237

238  
 239  
 240  
 241

**Figure 9: The top panel shows how the mean of LME simulations changes with increasing years of simulation overlap, approaching a mean value of  $\sim 0.21^{\circ}\text{C}$ . The bottom panel shows the rate of change of the LME mean temperature with increasing year of overlap, and fitted exponential curves shows that change in the mean falls to 1% of the maximum after  $\sim 125$  years of overlap.**

242  
 243  
 244  
 245  
 246  
 247  
 248

Removal of the offset allows the two climate model simulations to be consolidated into a full 0-1850 CE run (combining our ongoing 0-1270 CE run with LME 12). From this composite, we can extract the mean temperatures from the first (0-1000 CE) and second millenniums (1000-1850 CE) and compare these to the 1 CE control conditions and also the temperatures derived from our DIC glacier model (Fig. 10). We find that the composite temperatures agree fairly well with our DIC glacier model which reported that, on average, the last  $\sim 2$  ka had to have been  $\sim .44^{\circ}\text{C}$  cooler than 1 CE conditions.

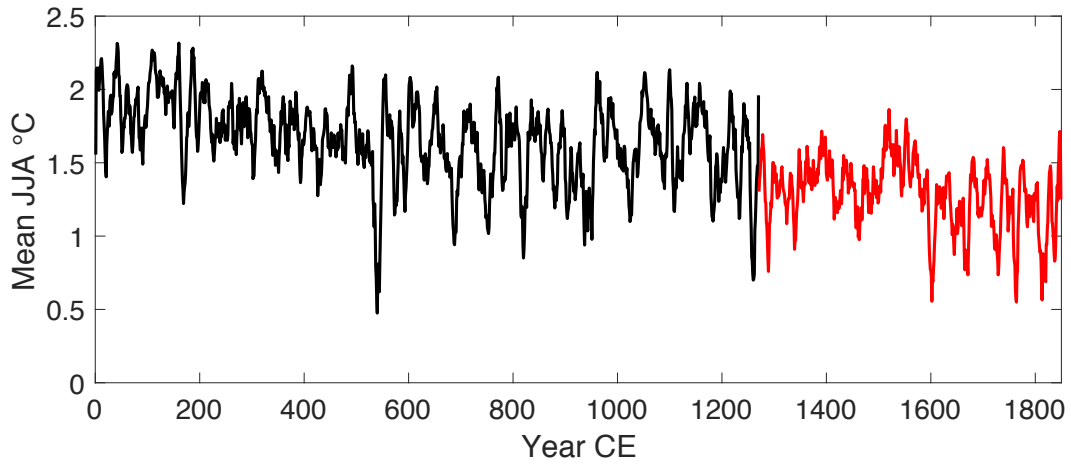

249

250  
251  
252

Figure 10: Plot of the composite simulated decadal temperatures ( $^{\circ}\text{C}$ ) for  $60\text{-}90^{\circ}\text{N}$  and  $90^{\circ}\text{W}\text{-}60^{\circ}\text{E}$ , showing the ongoing past2K simulation in black (0-1270 CE) and the corrected LME Ensemble member 12 in red (1271-1850 CE).

253



254 **References**

- 255 Alley, R. B.: GISP2 ice core temperature and accumulation data, IGBP PAGES/World Data  
256 Cent. Paleoclimatology Data Contrib. Ser., 13, 2004.
- 257 Anklin, M., Bales, R. C., Mosley-Thompson, E. and Steffen, K.: Annual accumulation at two  
258 sites in northwest Greenland during recent centuries, *J. Geophys. Res. Atmos.*, 103(D22),  
259 28775–28783, doi:10.1029/98JD02718, 1998.
- 260 Benn, D. I. and Evans, D. J. A.: *Glaciers and glaciation.*, 2010.
- 261 Braithwaite, R. J.: On glacier energy balance, ablation, and air temperature., *J. Glaciol.*, 27(97),  
262 381–391, 1981.
- 263 Braithwaite, R. J. and Olesen, O. B.: Calculation of glacier ablation from air temperature, West  
264 Greenland, Springer., 1989.
- 265 Cuffey, K. M. and Paterson, W. S. B.: *The physics of glaciers*, Academic Press., 2010.
- 266 Gardner, A. S., Sharp, M. J., Koerner, R. M., Labine, C., Boon, S., Marshall, S. J., Burgess, D.  
267 O. and Lewis, D.: Near-surface temperature lapse rates over arctic glaciers and their  
268 implications for temperature downscaling, *J. Clim.*, 22(16), 4281–4298,  
269 doi:10.1175/2009JCLI2845.1, 2009.
- 270 Gearheard, S., Pocernich, M., Stewart, R., Sanguya, J. and Huntington, H. P.: Linking Inuit  
271 knowledge and meteorological station observations to understand changing wind patterns at  
272 Clyde River, Nunavut, *Clim. Change*, 100(2), 267–294, doi:10.1007/s10584-009-9587-1,  
273 2010.
- 274 Haerberli, W.: Brief communication: On area- and slope-related thickness estimates and volume  
275 calculations for unmeasured glaciers, *Cryosph. Discuss.*, (January), doi:10.5194/tc-2015-  
276 222, 2016.
- 277 Hock, R.: Glacier melt: a review of processes and their modelling, *Prog. Phys. Geogr.*, 29(3),  
278 362–391, doi:10.1191/0309133305pp453ra, 2005.
- 279 Hooke, R. L.: Pleistocene ice at the base of the Barnes Ice Cap, Baffin Island, NWT, Canada, *J.*  
280 *Glaciology*, 17(75), 1976.
- 281 Jonsell, U., Navarro Valero, F. J., Bañón, M., Izargain, L., Jesús, J. and Otero García, J.:  
282 Sensitivity of a distributed temperature-radiation index melt model based on AWS  
283 observations and surface energy balance fluxes, Hurd Peninsula glaciers, Livingston Island,  
284 Antarctica, *Cryosph.*, 6(3), 539–552, 2012.
- 285 Jungclauss, J. H., Bard, E., Baroni, M., Braconnot, P., Cao, J., Chini, L. P., Egorova, T., Evans,  
286 M., González-Rouco, J. F., Goosse, H., Hurrett, G. C., Joos, F., Kaplan, J. O., Khodri, M.,  
287 Klein Goldewijk, K., Krivova, N., LeGrande, A. N., Lorenz, S. J., Luterbacher, J., Man, W.,  
288 Meinshausen, M., Moberg, A., Nehrbass-Ahles, C., Otto-Bliesner, B. I., Phipps, S. J.,  
289 Pongratz, J., Rozanov, E., Schmidt, G. A., Schmidt, H., Schmutz, W., Schurer, A., Shapiro,  
290 A. I., Sigl, M., Smerdon, J. E., Solanki, S. K., Timmreck, C., Toohey, M., Usoskin, I. G.,  
291 Wagner, S., Wu, C.-Y., Yeo, K. L., Zanchettin, D., Zhang, Q. and Zorita, E.: The PMIP4  
292 contribution to CMIP6 - Part 3: the Last Millennium, Scientific Objective and Experimental  
293 Design for the PMIP4 past1000 simulations, *Geosci. Model Dev. Discuss.*, 2016, 1–34,  
294 doi:10.5194/gmd-2016-278, 2016.
- 295 Kane, D. L., Gieck, R. E. and Hinzman, L. D.: Snowmelt modeling at small Alaskan Arctic  
296 watershed, *J. Hydrol. Eng.*, 2(4), 204–210, 1997.
- 297 Kessler, M. A., Anderson, R. S. and Stock, G. M.: Modeling topographic and climatic control of  
298 east-west asymmetry in Sierra Nevada glacier length during the Last Glacial Maximum, *J.*  
299 *Geophys. Res. Earth Surf.*, 111(2), 1–15, doi:10.1029/2005JF000365, 2006.

300 Koerner, R. M.: Mass balance of glaciers in the Queen Elizabeth Islands, Nunavut, Canada, *Ann.*  
301 *Glaciol.*, 42(1), 417–423, 2005.

302 Kumar, L., Skidmore, A. K. and Knowles, E.: Modelling topographic variation in solar radiation  
303 in a GIS environment, *Int. J. Geogr. Inf. Sci.*, 11(5), 475–497,  
304 doi:10.1080/136588197242266, 1997.

305 Kustas, W. P., Rango, A. and Uijlenhoet, R.: A simple energy budget algorithm for the snowmelt  
306 runoff model, *Water Resour. Res.*, 30(5), 1515–1527, doi:10.1029/94WR00152, 1994.

307 Lang, H. and Braun, L.: On the information content of air temperature in the context of snow  
308 melt estimation, *IAHS Publ*, 190, 347–354, 1990.

309 Lauriol, B., Carrier, Y., Beaudet, H. and Binda, G.: The residual snow cover in the Canadian  
310 Arctic in July: a means to evaluate the regional maximum snow depth in winter, *Arctic*,  
311 39(4), 309–315 [online] Available from: <http://www.jstor.org/stable/40511027>, 1986.

312 Mair, D., Burgess, D. and Sharp, M.: Thirty-seven year mass balance of Devon Ice Cap,  
313 Nunavut, Canada, determined by shallow ice coring and melt modeling, *J. Geophys. Res.*  
314 *Earth Surf.*, 110(1), 1–13, doi:10.1029/2003JF000099, 2005.

315 Marshall, S. J. and Sharp, M. J.: Temperature and melt modeling on the Prince of Wales Ice  
316 Field, Canadian high arctic, *J. Clim.*, 22(6), 1454–1468, doi:10.1175/2008JCLI2560.1,  
317 2009.

318 Nawri, N. and Stewart, R. E.: Climatological features of orographic low-level jets over frobisher  
319 bay, *Atmosphere-Ocean*, 44(4), 397–413, doi:10.3137/ao.440405, 2010.

320 Otto-Bliesner, B. L., Brady, E. C., Fasullo, J., Jahn, A., Landrum, L., Stevenson, S.,  
321 Rosenbloom, N., Mai, A. and Strand, G.: Climate variability and change since 850 ce an  
322 ensemble approach with the community earth system model, *Bull. Am. Meteorol. Soc.*,  
323 97(5), 787–801, doi:10.1175/BAMS-D-14-00233.1, 2016.

324 Serreze, M. C., Rehder, M. C., Barry, R. G., Walsh, J. E. and Robinson, D. A.: Variations in  
325 aerologically derived Arctic precipitation and snowfall, *Ann. Glaciol.*, 21, 77–82, 1995.

326 Williams, L. D.: The variation of corrie elevation and equilibrium line altitude with aspect in  
327 eastern Baffin Island, NWT, Canada, *Arct. Alp. Res.*, 169–181, 1975.

328
